# Supplementary material for: Facile one-pot synthesis of self-assembled nitrogen-doped carbon dots/cellulose nanofibril hydrogel with enhanced fluorescence and mechanical properties
Source: Royal Society of Chemistry journal article supplement (doi:10.1039/d0gc00845a), 2020-01-01
Supplement: d0gc00845a1.pdf [file d0gc00845a1.pdf]

Electronic Supplementary Information  
*for*  
Facile One-Pot Synthesis of Self-Assembled Nitrogen-Doped Carbon  
Dots/Cellulose Nanofibril Hydrogel with Enhanced Fluorescence and  
Mechanical Properties

Xueqi Chen,<sup>a,§</sup> Zihui Song,<sup>a,§</sup> Shaopeng Li,<sup>a</sup> Nguyen Tat Thang,<sup>b</sup> Xing Gao,<sup>a</sup> Xinchao Gong,<sup>a</sup> Minghui Guo<sup>a,\*</sup>

<sup>a</sup>Key Laboratory of Bio-based Material Science and Technology of Ministry of Education, Northeast Forestry University, Harbin 150040, P.R. China.

<sup>b</sup>Vietnam National University of Forestry, Hanoi 156220, Vietnam.

<sup>§</sup> These authors contribute equally to this work.

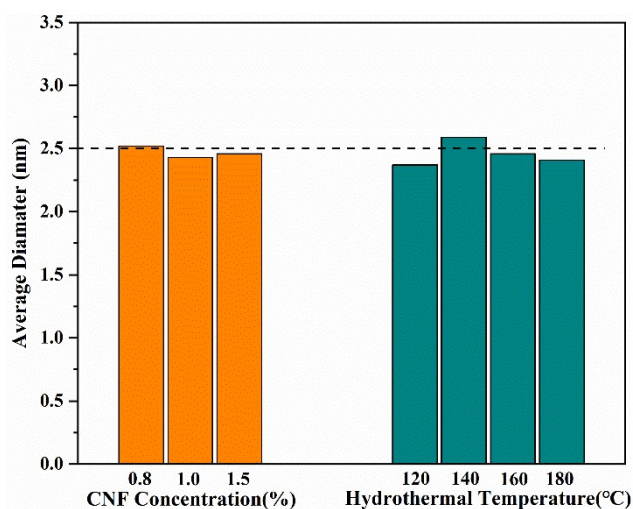

Fig. S1 Average particle size of NCDs prepared at different CNF concentrations (hydrothermal temperature of 160 °C) and hydrothermal temperatures (CNF concentration of 1.5 wt%).

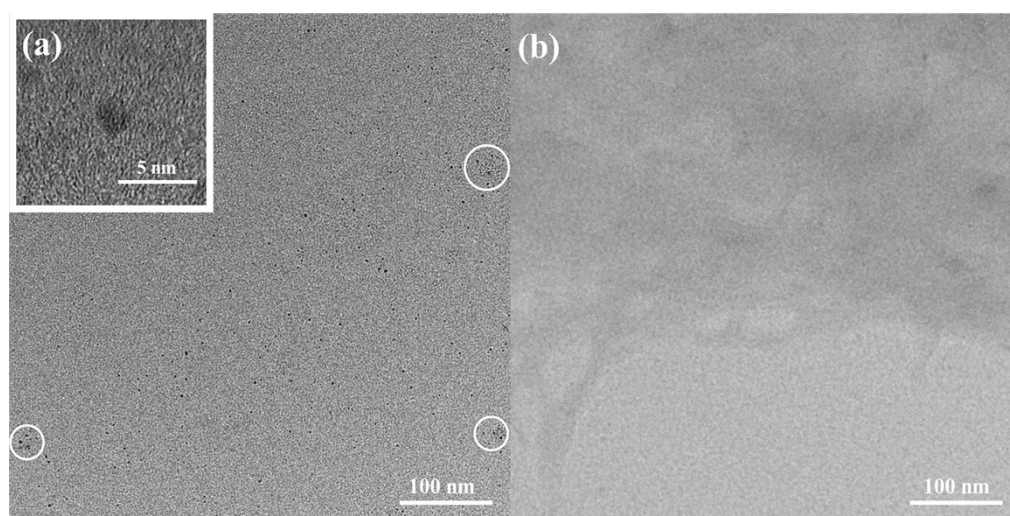

Fig. S2 TEM images of (a) CCDs and (b) CNF-gel.

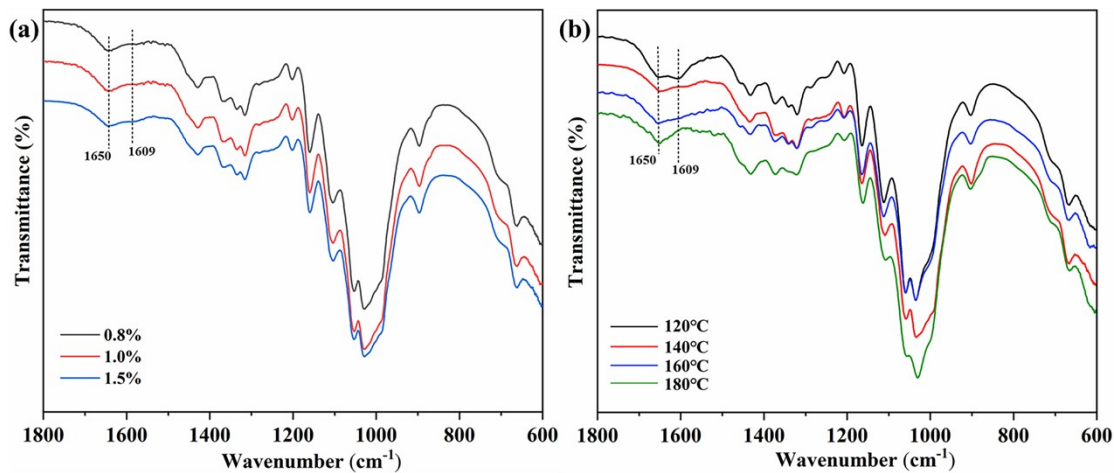

Fig. S3 FT-IR spectra of NCDs/CNF-gel prepared at different CNF concentrations (hydrothermal temperature of 160 ° C) and hydrothermal temperatures (CNF concentration of 1.5 wt%).

Table S1 The summary of element analysis results of the NCDs and NCDs/CNF-gel prepared in different CNF concentrations(C) and hydrothermal temperatures(T).

| Samples      | T (°C) | C (wt%) | C (%) | H (%) | N (%) | O <sup>a</sup> (%) | N/C <sup>a</sup> (%) |
|--------------|--------|---------|-------|-------|-------|--------------------|----------------------|
| NCDs         | 120    | 1.5     | 38.15 | 3.36  | 22.73 | 35.76              | 59.58                |
|              | 140    |         | 39.02 | 3.27  | 23.26 | 34.45              | 59.61                |
|              | 160    |         | 38.09 | 3.21  | 22.75 | 35.95              | 59.73                |
|              | 180    |         | 38.26 | 3.13  | 22.39 | 36.22              | 58.52                |
|              | 160    | 0.8     | 37.94 | 3.15  | 22.45 | 36.46              | 59.17                |
|              |        | 1.0     | 38.16 | 3.22  | 22.67 | 35.95              | 59.41                |
|              |        | 1.5     | 38.09 | 3.21  | 22.75 | 35.95              | 59.73                |
|              | 120    | 1.5     | 45.52 | 6.32  | 8.76  | 39.4               | 19.24                |
|              | 140    |         | 45.93 | 6.27  | 9.28  | 38.52              | 20.20                |
| NCDs/CNF-gel | 160    |         | 46.78 | 5.63  | 10.87 | 36.72              | 23.24                |
|              | 180    |         | 47.95 | 5.42  | 12.09 | 34.54              | 25.21                |
|              | 160    | 0.8     | 44.92 | 5.56  | 12.12 | 36.6               | 23.27                |
|              |        | 1.0     | 45.55 | 5.94  | 11.63 | 37.02              | 23.33                |
|              |        | 1.5     | 46.78 | 5.63  | 10.87 | 36.72              | 23.24                |

<sup>a</sup> Calculated value.

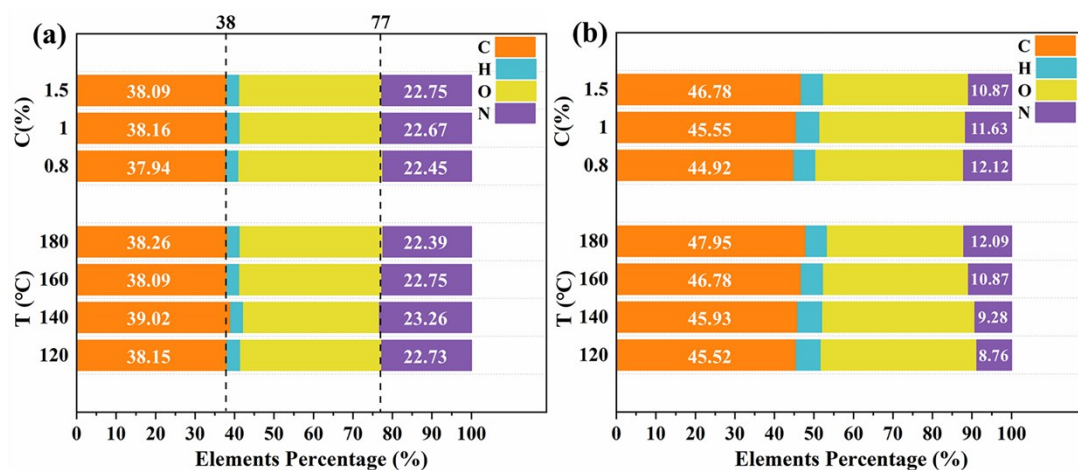

Fig. S4 Elemental composition of (a) NCDs and (b) NCDs/CNF-gels prepared at different CNF concentrations (C) and hydrothermal temperatures (T).

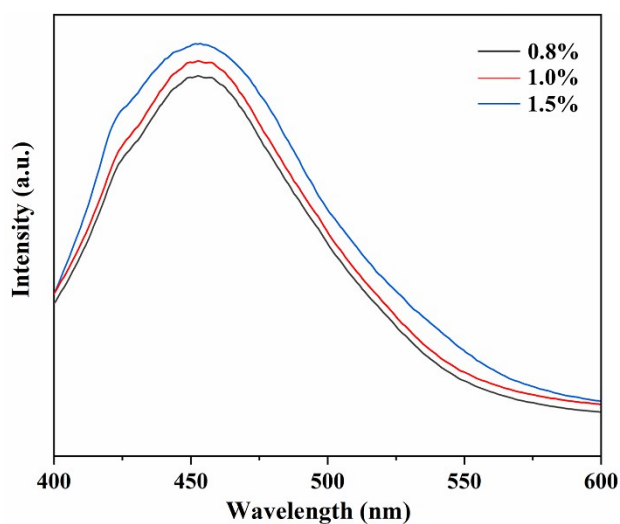

Fig. S5 PL spectra of NCDs/CNF-gels prepared at different CNF concentrations.
